# Supplementary material for: Characterization of the First Secreted Sorting Nexin Identified in the Leishmania Protists
Source: MDPI journal article supplement (doi:10.3390/ijms25074095), 2024-04-07
Supplement: s1 [file s1]

A. *LdSNXi* cDNA Sequence (*L.donovani* strain LG13)

ATGGCCGCCGGCAACTCCATCTCTGTAAAGGTGGATGTGCCGTCCCAGG  
TGAAGGGCCAGGGCACTCTGGAGATGTCTGTAACATCTACCCCATCAC  
GATGCGCTTGCCCTGGCTTTATGAGCGATGCTCGGTTCAACCGGCGGTAC  
ACCGACTTTGAGACTCTGCGCGGCCAGCTGTGTGCGACCTACTGGTACT  
GCATTGTGCCACCCATTCCAGAGAAGGAGTCGGTGCAGGATAAGCTGGG  
AAAGCTGCCACGCATGGTGGCGTCGGCGAAGGAGACGACCGCCTCCGAG  
GGCGACCTGCTCGAGTACCGTCTGATCAGCCTGCGGCGCTTCCTGCAGC  
GGCTTGCCCTACCACCCCATCCTGGGCAAGTCTGACCTTCTACAGAAGTT  
CACGAACGATAACGAGTGGCGCCAGTGCCTCGCGACCCGGTGAAGCCG  
CCTCGCTTTATCGTGTCTGTCGTCGCTGGAGGAGATCGCCAGATCATGGG  
CTCCGTCAAGCAGTGCCTCTGGCGCCGGTACTCAAGGTAGCGGTGGCGC  
TGCCGGGGGTGGTGGCGTTAGCCAAACCGGAGCGGCGTATCAGTTGGCA  
CTGACTCAAGAGCCAGTGGATGAGGCGACGTGGAGGGCGACAAGCGAGT  
ACATTGGTGAGCTGGAGTCTAACCTCAAGAGCATGCGCAACCTGCTGGA  
GGCACTCGTGGATCGTCACCGGCGCGCCGCTCCGCCGTGAGCAACTTC  
GCCGCCTCTTTTGGGCTGCTTGCGGAAGGCGAAGAGGATGCCGAGCTGC  
GCGGCGCCATCGAAGGGGTGCGCGACTGCGGTGCGAAAGTGGCAGATGT  
CTACAGCAAACACGCTGACAACGAGTCGACGCGGCTTGTCAGCACGTTA  
AGCTTTTACGTGGGTATGTGTGCCGCCGTGCGGGAGACTCTGAGCCACA  
TGTTTCAGCGCCCGCCAGTATCTGCGCAACTTGCAGAAGAAGGGCCAGGA  
ACTGCAGGCGTTCGGCGATGCGGGCACAGTCGGCCAACCAGGTGCAGCTG  
CAGAGCGAGCTGCACTTCGTGAATGAGCAGCGGGCCACCTCGAGGAAG  
ACCTCATGGGCGCCGAGAAGACCTTCAGCGAGGAATTTATTCTCTTCCA  
CGAAAACAAGCAATATGACGCCAAGGATATGCTGAAGAAGTTTGGCATG  
CTGGAGCTCAGCTTCTCTGAGTCGATGAAGCAGGAGTGGGACGCCCTGC  
GGCCAATGTTGGAGTCCCTTGGCACATAG

B. *LdSNXi* Amino acid Sequence (*L.donovani* strain LG13)

MAAGNSISVKVDVPSQVKGQGTLEMSYYIYPITMRLPGFMSDARFNRRY  
TDFETLRGQLCATYWYCIVPPIPEKESVQDKLGKLPRMVASAKETTASE  
GDLLEYRRISLRRFLQRLAYHPILGKSDLLQKFTNDNEWQCTRDPVKP  
PRFIVSSSLEEIARSWAPSSSASGAGTQGS GGAAGGGGVSQTGAAYQLA  
LTQEPVDEATWRATSEYIGELESNLKSMRNLLEALVDRHRRRAASAVSNF  
AASFGLLAEGEEDAELRGAI EGVRDCGRKVADVYSKHADNESTRLVSTL  
SFYVGMCAAVRETL SHMFSARQYLRNLQKKQELQASAMRAQSANQVQL  
QSELHFVNEQRAHLEEDLMGAEKTFSEEFILFHENKQYDAKDMLKKFGM  
LELSFSESMKQEWDA LRPMLES LGT

CLUSTAL O(1.2.4) multiple sequence alignment  
DNA Sequence

|                |                                                                        |      |
|----------------|------------------------------------------------------------------------|------|
| LdSNXi         | ATGGCCGCCGGCAACTCCATCTCTGTAAAGGTGGATGTGCCGTCCCAGGTGAAGGGCCAG           | 60   |
| LDBPK_352470.1 | ATGGCCGCCGGCAACTCCATCTCTGTAAAGGTGGATGTGCCGTCCCAGGTGAAGGGCCAG<br>*****  | 60   |
| LdSNXi         | GGCACTCTGGAGATGTCGTACTACATCTACCCCATCACGATGCGCTTGCCTGGCTTTATG           | 120  |
| LDBPK_352470.1 | GGCACTCTGGAGATGTCGTACTACATCTACCCCATCACGATGCGCTTGCCTGGCTTTATG<br>*****  | 120  |
| LdSNXi         | AGCGATGCTCGGTTCAACCGGCGGTACACCGACTTTGAGACTCTGCGCGGCCAGCTGTGT           | 180  |
| LDBPK_352470.1 | AGCGATGCTCGGTTCAACCGGCGGTACACCGACTTTGAGACTCTGCGCGGCCAGCTGTGT<br>*****  | 180  |
| LdSNXi         | GCGACCTACTGGTACTGTCATTGTGCCACCCATTCCAGAGAAGGAGTCGGTGCAGGATAAG          | 240  |
| LDBPK_352470.1 | GCGACCTACTGGTACTGTCATTGTGCCACCCATTCCAGAGAAGGAGTCGGTGCAGGATAAG<br>***** | 240  |
| LdSNXi         | CTGGGAAAGCTGCCACGCATGGTGGCGTCGGCGAAGGAGACGACCGCTCCGAGGGCGAC            | 300  |
| LDBPK_352470.1 | CTGGGAAAGCTGCCACGCATGGTGGCGTCGGCGAAGGAGACGACCGCTCCGAGGGCGAC<br>*****   | 300  |
| LdSNXi         | CTGCTCGAGTACCGTCGTATCAGCCTGCGGCGCTTCCTGCAGCGGCTTGCCTACCACCCC           | 360  |
| LDBPK_352470.1 | CTGCTCGAGTACCGTCGTATCAGCCTGCGGCGCTTCCTGCAGCGGCTTGCCTACCACCCC<br>*****  | 360  |
| LdSNXi         | ATCCTGGGCAAGTCTGACCTTCTACAGAAGTTCACGAACGATAACGAGTGGCGCCAGTGC           | 420  |
| LDBPK_352470.1 | ATCCTGGGCAAGTCTGACCTTCTACAGAAGTTCACGAACGATAACGAGTGGCGCCAGTGC<br>*****  | 420  |
| LdSNXi         | ACTCGGACCCGGTGAAGCCGCCTCGCTTTATCGTGTCTGTCGTCTGGAGGAGATCGCC             | 480  |
| LDBPK_352470.1 | ACTCGGACCCGGTGAAGCCGCCTCGCTTTATCGTGTCTGTCGTCTGGAGGAGATCGCC<br>*****    | 480  |
| LdSNXi         | AGATCATGGGCTCCGTCAAGCAGTGCCCTCTGGCGCCGGTACTCAAGGTAGCGGTGGCGCT          | 540  |
| LDBPK_352470.1 | AGATCATGGGCTCCGTCAAGCAGTGCCCTCTGGCGCCGGTACTCAAGGTAGCGGTGGCGCT<br>***** | 540  |
| LdSNXi         | GCCGGGGGTGGTGGCGTTAGCCAAACCGGAGCGCGTATCAGTTGGCACTGACTCAAGAG            | 600  |
| LDBPK_352470.1 | GCCGGGGGTGGTGGCGTTAGCCAAACCGGAGCGCGTATCAGTTGGCACTGACTCAAGAG<br>*****   | 600  |
| LdSNXi         | CCAGTGGATGAGGCGACGTGGAGGGCGACAAGCGAGTACATTGGTGAGCTGGAGTCTAAC           | 660  |
| LDBPK_352470.1 | CCAGTGGATGAGGCGACGTGGAGGGCGACAAGCGAGTACATTGGTGAGCTGGAGTCTAAC<br>*****  | 660  |
| LdSNXi         | CTCAAGAGCATGCGCAACCTGCTGGAGGCACTCGTGGATCGTCACCGCGCGCCGCTCC             | 720  |
| LDBPK_352470.1 | CTCAAGAGCATGCGCAACCTGCTGGAGGCACTCGTGGATCGTCACCGCGCGCCGCTCC<br>*****    | 720  |
| LdSNXi         | GCCGTGAGCAACTTCGCCGCTCTTTTGGGCTGCTTGCAGGAGGCGAAGAGGATGCCGAG            | 780  |
| LDBPK_352470.1 | GCCGTGAGCAACTTCGCCGCTCTTTTGGGCTGCTTGCAGGAGGCGAAGAGGATGCCGAG<br>*****   | 780  |
| LdSNXi         | CTGCGCGGCGCCATCGAAGGGGTGCGCGACTGCGGTGCGAAAGTGGCAGATGTCTACAGC           | 840  |
| LDBPK_352470.1 | CTGCGCGGCGCCATCGAAGGGGTGCGCGACTGCGGTGCGAAAGTGGCAGATGTCTACAGC<br>*****  | 840  |
| LdSNXi         | AAACACGCTGACAACGAGTCGACGCGGCTTGTGAGCACGTTAAGCTTTTACGTGGGTATG           | 900  |
| LDBPK_352470.1 | AAACACGCTGACAACGAGTCGACGCGGCTTGTGAGCACGTTAAGCTTTTACGTGGGTATG<br>*****  | 900  |
| LdSNXi         | TGTGCCGCCGTGCGGGAGACTCTGAGCCACATGTTGAGCGCCCGCCAGTATCTGCGCAAC           | 960  |
| LDBPK_352470.1 | TGTGCCGCCGTGCGGGAGACTCTGAGCCACATGTTGAGCGCCCGCCAGTATCTGCGCAAC<br>*****  | 960  |
| LdSNXi         | TTGCAGAAGAAGGGCCAGGAACGTCAGGCGTCGGCGATGCGGGCACAGTCGGCCAACCAG           | 1020 |
| LDBPK_352470.1 | TTGCAGAAGAAGGGCCAGGAACGTCAGGCGTCGGCGATGCGGGCACAGTCGGCCAACCAG<br>*****  | 1020 |
| LdSNXi         | GTGCAGCTGCAGAGCGAGCTGCACTTCGTGAATGAGCAGCGGGCCACCTCGAGGAAGAC            | 1080 |
| LDBPK_352470.1 | GTGCAGCTGCAGAGCGAGCTGCACTTCGTGAATGAGCAGCGGGCCACCTCGAGGAAGAC<br>*****   | 1080 |
| LdSNXi         | CTCATGGGCGCCGAGAAGACCTTCAGCGAGGAATTTATTCTCTTCCACGAAAACAAGCAA           | 1140 |
| LDBPK_352470.1 | CTCATGGGCGCCGAGAAGACCTTCAGCGAGGAATTTATTCTCTTCCACGAAAACAAGCAA<br>*****  | 1140 |
| LdSNXi         | TATGACGCCAAGGATATGCTGAAGAAGTTTGGCATGCTGGAGCTCAGCTTCTCTGAGTCG           | 1200 |
| LDBPK_352470.1 | TATGACGCCAAGGATATGCTGAAGAAGTTTGGCATGCTGGAGCTCAGCTTCTCTGAGTCG<br>*****  | 1200 |
| LdSNXi         | ATGAAGCAGGAGTGGGACGCCCTGCGGCCAATGTTGGAGTCCCTTGGCACATAG                 | 1254 |
| LDBPK_352470.1 | ATGAAGCAGGAGTGGGACGCCCTGCGGCCAATGTTGGAGTCCCTTGGCACATAG<br>*****        | 1254 |

# CLUSTAL O(1.2.4) multiple sequence alignment Amino acid Sequence

|                |                                                                |     |
|----------------|----------------------------------------------------------------|-----|
| LdSNXi         | MAAGNSISVKVDVPSQVKGQGTLEMSYIYPITMRLPGFMSDARFNRRYTDFETLRGQLC    | 60  |
| LDBPK_352470.1 | MAAGNSISVKVDVPSQVKGQGTLEMSYIYPITMRLPGFMSDARFNRRYTDFETLRGQLC    | 60  |
|                | *****                                                          |     |
| LdSNXi         | ATYWYCIVPPIPEKESVQDKLGKLPRMVASAKETTASEGDLLEYRRISLRRFLQRLAYHP   | 120 |
| LDBPK_352470.1 | ATYWYCIVPPIPEKESVQDKLGKLPRMVASAKETTASEGDLLEYRRISLRRFLQRLAYHP   | 120 |
|                | *****                                                          |     |
| LdSNXi         | ILGKSDLLQKFTNDNEWRQCTRDVPVKPPRFIVSSSLEEIARSWAPSSSASGAGTQGS GGA | 180 |
| LDBPK_352470.1 | ILGKSDLLQKFTNDNEWRQCTRDVPVKPPRFIVSSSLEEIARSWAPSSSASGAGTQGS GGA | 180 |
|                | *****                                                          |     |
| LdSNXi         | AGGGGVSQTGAAYQLALTQEPVDEATWRATSEYIGELESNLKSMRNLLEALVDRHRRRAAS  | 240 |
| LDBPK_352470.1 | AGGGGVSQTGAAYQLALTQEPVDEATWRATSEYIGELESNLKSMRNLLEALVDRHRRRAAS  | 240 |
|                | *****                                                          |     |
| LdSNXi         | AVSNFAASFGLLAEGEEDAELRGAIEGVRDCGRKVADVYSKHADNESTRLVSTLSFYVGM   | 300 |
| LDBPK_352470.1 | AVSNFAASFGLLAEGEEDAELRGAIEGVRDCGRKVADVYSKHADNESTRLVSTLSFYVGM   | 300 |
|                | *****                                                          |     |
| LdSNXi         | CAAVRETLSHMFSARQYLRNLQKKGQELQASAMRAQSANQVQLQSELHFVNEQRAHLEED   | 360 |
| LDBPK_352470.1 | CAAVRETLSHMFSARQYLRNLQKKGQELQASAMRAQSANQVQLQSELHFVNEQRAHLEED   | 360 |
|                | *****                                                          |     |
| LdSNXi         | LMGAECTFSEEFILFHENKQYDAKDMLKKFGMLELSFSESMKQEWDALRPMLES LGT     | 417 |
| LDBPK_352470.1 | LMGAECTFSEEFILFHENKQYDAKDMLKKFGMLELSFSESMKQEWDALRPMLES LGT     | 417 |
|                | *****                                                          |     |
