# Supplementary material for: Characterization of the First Secreted Sorting Nexin Identified in the Leishmania Protists
Source: Int J Mol Sci. 2024 Apr 7;25(7):4095. doi: 10.3390/ijms25074095 (PMC11012638; doi:10.3390/ijms25074095)
Supplement: Supplementary file 1 [file ijms-25-04095-s001.zip]

Archive with 11 entries (11 files):
- LdSNXi sequence.pdf
- Supplementary Figure S1.png
- Supplementary Figure S2.png
- Supplementary Figure S3.png
- Supplementary Figure S4.png
- Supplementary Figure S5.png
- Supplementary Figure S6.png
- Supplementary Figure S7.png
- Supplementary Figure S8.png
- SUPPLEMENTARY MATERIAL.pdf
- Supplemetary Figure S9.png
